# Supplementary material for: Guided transport of nanoparticles by plasmonic nanowires
Source: Royal Society of Chemistry journal article supplement (doi:10.1039/c6nr07490a), 2016-01-01
Supplement: c6nr07490a3.pdf [file c6nr07490a3.pdf]

## Supporting information

### Guided Transport of Nanoparticles by Plasmonic Nanowires

Cui Yang<sup>a</sup>, Deng Pan<sup>a</sup>, Lianming tong<sup>b\*</sup> and Hongxing Xu<sup>c\*</sup>

<sup>a</sup>. Institute of Physics, Chinese Academy of Sciences, Beijing 100190, P.R. China.

<sup>b</sup>. Centre for Nanochemistry, College of Chemistry and Molecular Engineering, Peking University, Beijing 100871, P.R. China.

<sup>c</sup>. School of Physic and Technology, Wuhan University, Wuhan 430072, Hubei, P.R. China.

Email: [tonglm@pku.edu.cn](mailto:tonglm@pku.edu.cn), [hxxu@whu.edu.cn](mailto:hxxu@whu.edu.cn)

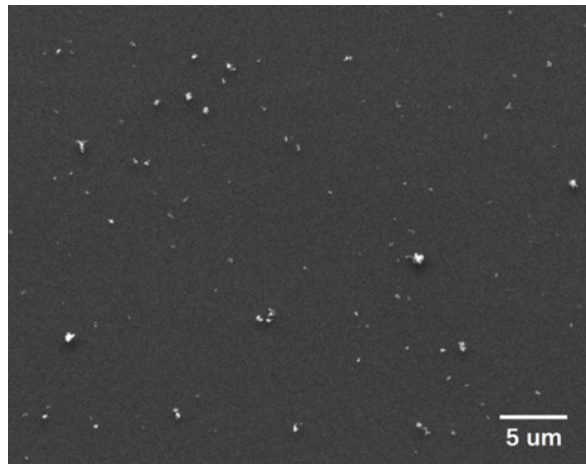

**Fig. S1** The SEM image of  $\text{TiO}_2$  nanoparticles. The nominal diameter is 42.3 nm. The particles were easily aggregated in aqueous.

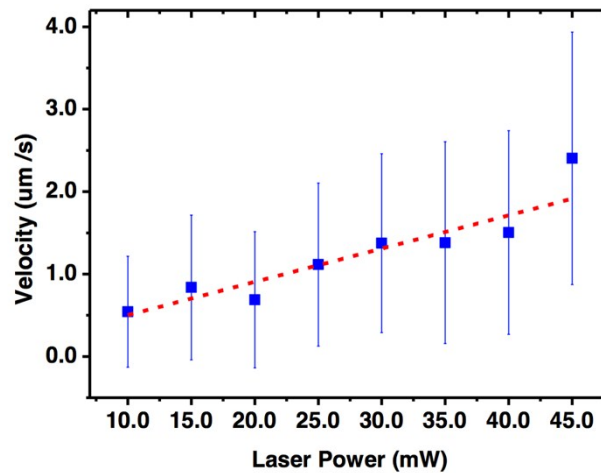

**Fig. S2** The relationship between the velocity of nanoparticles and the incident laser power. The blue dots are the experimental results for several particles and the red dash line is the linear fit.

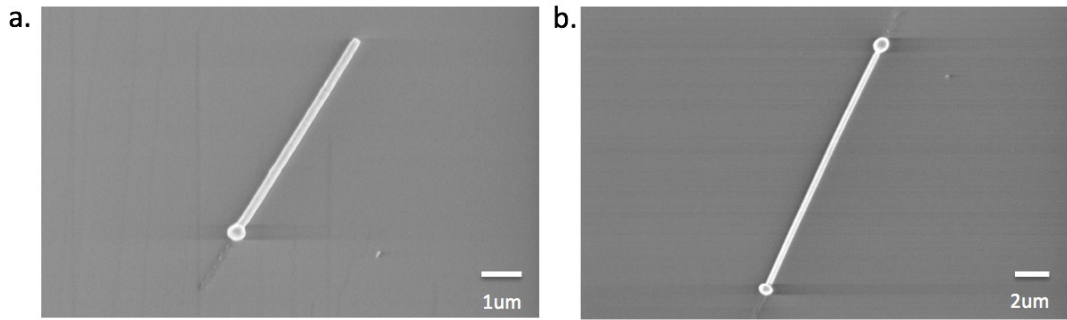

**Fig. S3** (a, b) SEM images of silver nanowires' melting and reshaping under the illumination of 1064 nm laser. The laser heating effect of the nanowire can be evidenced by the melting and recrystallization of the terminals of the nanowire. When the power of the 1064 nm laser was increased to 200 mW (before it enters the optical microscope), the incident terminal of the silver nanowire can be melted, and reshaped to a sphere of 500 nm diameter, as shown in Fig. S3 (a, b).

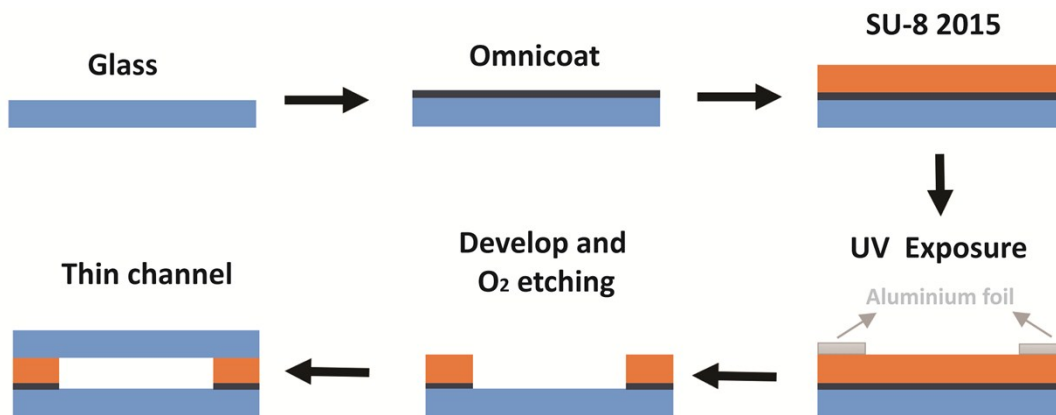

**Fig. S4** The process of micro-fabricating thin channel of 10  $\mu\text{m}$  height. An adhesive layer (Omnicat) and the photoresist (SU-8) was coated on a cleaned glass substrate by spin-coating. The height of the cell is determined by the thickness of SU-8. Then the ultraviolet (UV) ray was used to etch SU-8. The sample was transferred to the developer and fixer bath, then washed by deionized water. Reactive Ion Etching (RIE) was used to clean the channel before coating the top glass slide.

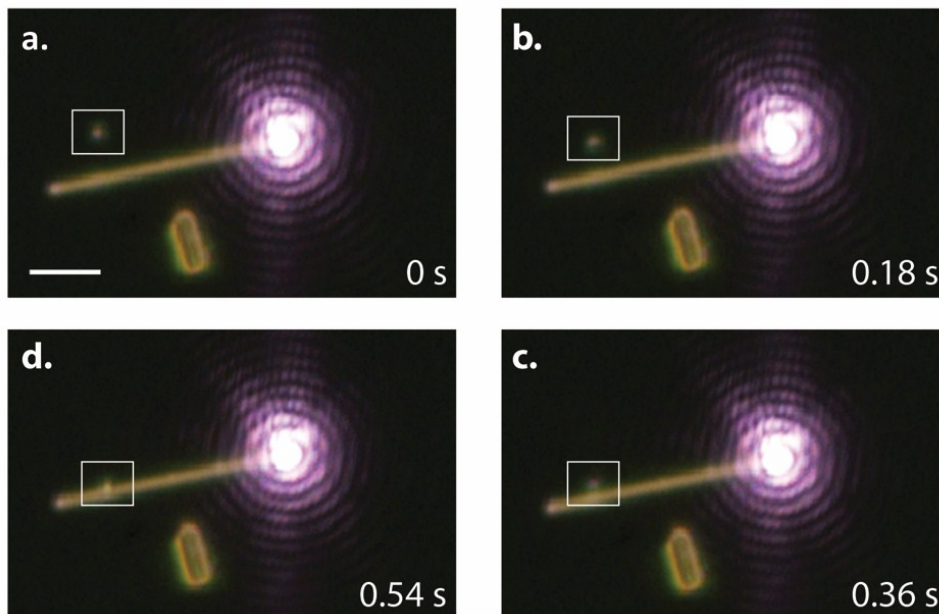

**Fig. S5** The optical trapping of  $\text{TiO}_2$  nanoparticles by a silver nanowire in the thin channel of  $10\ \mu\text{m}$  in height, which was measured by surface profilers. The  $1064\ \text{nm}$  laser illuminated at the right end of Ag nanowires. The white square shows the position of the  $\text{TiO}_2$  nanoparticle. A movement of the trapped nanoparticle was not observed. The scale bar is  $500\ \text{nm}$ .

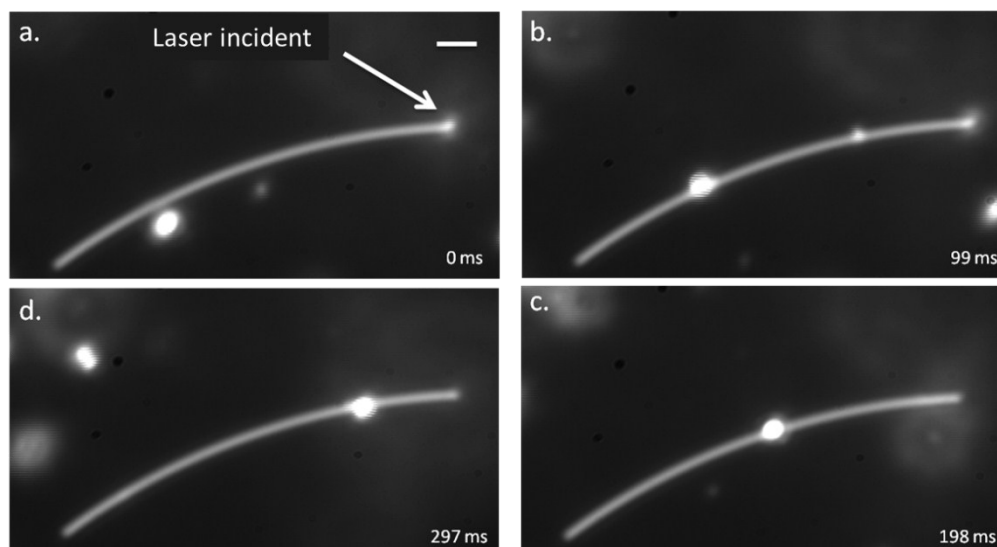

**Fig. S6** Experimental results of nanoparticles' movement along a curved silver nanowire. The white arrow in Figure 6 (a) highlights the incident end of the laser illumination. The scale bar is  $0.5\ \mu\text{m}$  and the laser power was  $75\ \text{mW}$ . (a - d) A serial of DF images showing the movement of a  $\text{TiO}_2$  particle (or cluster) along the nanowire.

**Movie 1** shows the optical trapping and movement of TiO<sub>2</sub> nanoparticles by a silver nanowire (Figure 2 in the main text). The time interval between frames was 0.3 s. **Movie 2** shows the selective trapping and movement of TiO<sub>2</sub> nanoparticles by switching the polarization of the incident laser on a V-shaped nanowire (Figure 5 in the main text). The time interval between frames was 33 ms.
